# Supplementary material for: Representation of Older Adults in the ACC/AHA/SCAI Guideline for Coronary Artery Revascularization
Source: PubMed Central journal article supplement (PMC11245718; doi:10.1001/jamanetworkopen.2024.21547), 2024-07-12
Supplement: jamanetwopen-e2421547-s001.pdf [file jamanetwopen-e2421547-s001.pdf]

## Supplemental Online Content

Jamil Y, Sibindi C, Park DY, Frampton J, Damluji AA, Nanna MG. Representation of older adults in the ACC/AHA/SCAI guideline for coronary artery revascularization. *JAMA Netw Open*. 2024;7(7):e2421547. doi:10.1001/jamanetworkopen.2024.21547

### **eMethods.**

This supplemental material has been provided by the authors to give readers additional information about their work.

## eMethods

**Study type:** Cross-sectional study. STROBE checklist was followed.

### Search strategy and selection criteria

**Representative search strategy: All references cited in the document:** 2021 ACC/AHA/SCAI Guideline for Coronary Artery Revascularization: A Report of the American College of Cardiology/American Heart Association Joint Committee on Clinical Practice Guidelines. <sup>1</sup>

**Data Extraction:** Data was extracted on an Excel spreadsheet template that was agreed on before data extraction. All studies were eligible unless they met the exclusion criteria: missing age, review article, case report, meta-analysis/systematic review, or studies not related to cardiovascular disease.

### Data sheet included: We extracted data for the following:

- Name of the first author and study, year of publication,
- type of study (observational or randomized controlled trial)
- The number of individuals included in the study,
- mean age,
- Exclusive inclusion of adults ( $\geq 75/80$  years) if the full-text article mentioned inclusion based on age or if sub-group analysis was performed,
- Age inclusion of adults ( $\geq 75/80$  years): if the mean/median age + first standard deviation or Interquartile range was above 75/80,
- Exclusion of adults  $\geq 75/80$  years
- Geriatric outcomes: frailty, dementia, cognitive impairment, falls, polypharmacy, dependence in daily living

**Data analysis.** The mean age, the total number of included individuals, the number of studies that included or excluded adults based on age cut-off, and the number of studies with geriatric outcomes were calculated on an Excel spreadsheet. This was a descriptive analysis.

Ethical review of study: Institutional review board approval and informed patient consent were not required because this study is a cross-sectional study of previously published, publicly available data without specific patient identifiers.

References:

1. Lawton JS, Tamis-Holland JE, Bangalore S, et al. 2021 ACC/AHA/SCAI Guideline for Coronary Artery Revascularization. *Journal of the American College of Cardiology*. 2022;79(2):e21-e129. doi:doi:10.1016/j.jacc.2021.09.006
