# Supplementary material for: Representation of Older Adults in the ACC/AHA/SCAI Guideline for Coronary Artery Revascularization
Source: PubMed Central journal article supplement (PMC11245718; doi:10.1001/jamanetworkopen.2024.21547), 2024-07-12
Supplement: jamanetwopen-e2421547-s002.pdf [file jamanetwopen-e2421547-s002.pdf]

## Data Sharing Statement

Jamil. Representation of Older Adults in the ACC/AHA/SCAI Guideline for Coronary Artery Revascularization. *JAMA Netw Open*. Published July 12, 2024.  
doi:10.1001/jamanetworkopen.2024.21547

### Data

**Data available:** No
